# Supplementary material for: Oxygen‐Sensing Nox4 Generates Genotoxic ROS to Induce Premature Senescence of Nucleus Pulposus Cells through MAPK and NF‐κB Pathways
Source: Hindawi journal article supplement (doi:10.1155/2017/7426458), 2017-01-01
Supplement: f1 [file 7426458.f1.pdf]

**Table 1. Abbreviations in this study**

|                  |                                                                   |
|------------------|-------------------------------------------------------------------|
| IVD              | intervertebral disc                                               |
| IDD              | intervertebral disc degeneration                                  |
| SASP             | senescence-associated secreted phenotype                          |
| NP               | nucleus pulposus                                                  |
| AF               | annulus fibrosus                                                  |
| SA- $\beta$ -Gal | senescence-associated $\beta$ -galactosidase                      |
| ECM              | extracellular matrix                                              |
| Nox4             | NADPH oxidase 4                                                   |
| GSH              | glutathione                                                       |
| Rb               | retinoblastoma protein                                            |
| NAC              | N-acetyl-L-cysteine                                               |
| ADAMTS           | a disintegrin and metalloproteinase with<br>thrombospondin motifs |
| MMP              | matrix metalloproteinase                                          |
| p-Rb             | phosphorylated retinoblastoma protein                             |
| ROS              | reactive oxygen species                                           |
| U                | U0126                                                             |
| SB               | SB202190                                                          |
| FBS              | fetal bovine serum                                                |
| SP               | SP600125                                                          |

---

|       |                                     |
|-------|-------------------------------------|
| PBS   | phosphate-buffered saline           |
| siRNA | small interfering RNA               |
| GFP   | green fluorescent protein           |
| MOD   | mean optical density                |
| Msr   | methionine sulfoxide reductase      |
| IL    | interleukin                         |
| CCL   | C-C motif ligand                    |
| CXCL  | C-X-C motif ligand                  |
| SIPS  | stress-induced premature senescence |

---

## Figures

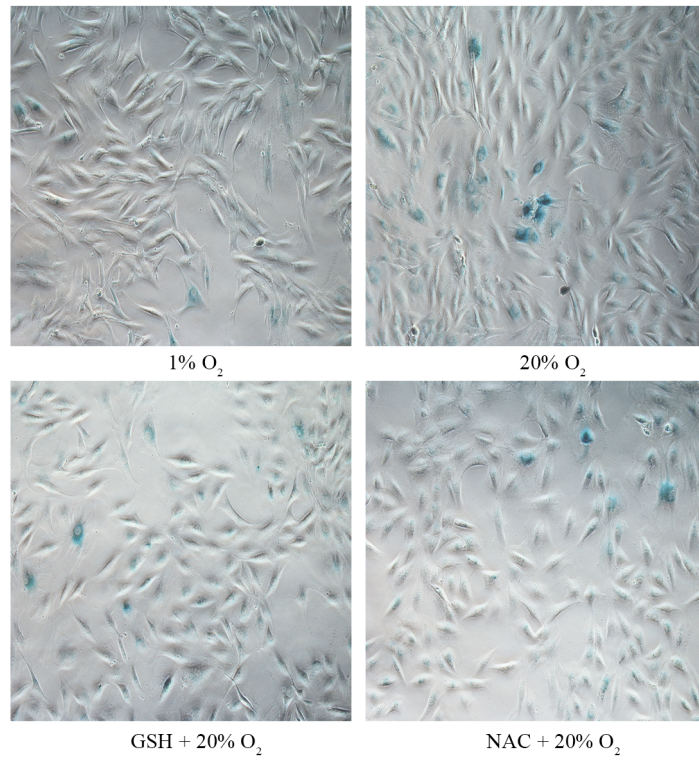

**Figure S1.** Senescence-associated  $\beta$ -galactosidase (SA- $\beta$ -gal) staining of high oxygen tension-treated nucleus pulposus (NP) cells. NP cells were pretreated with glutathione (GSH) and N-acetyl-L-cysteine (NAC) for 30 min followed by high oxygen tension treatment for ROS scavenging.

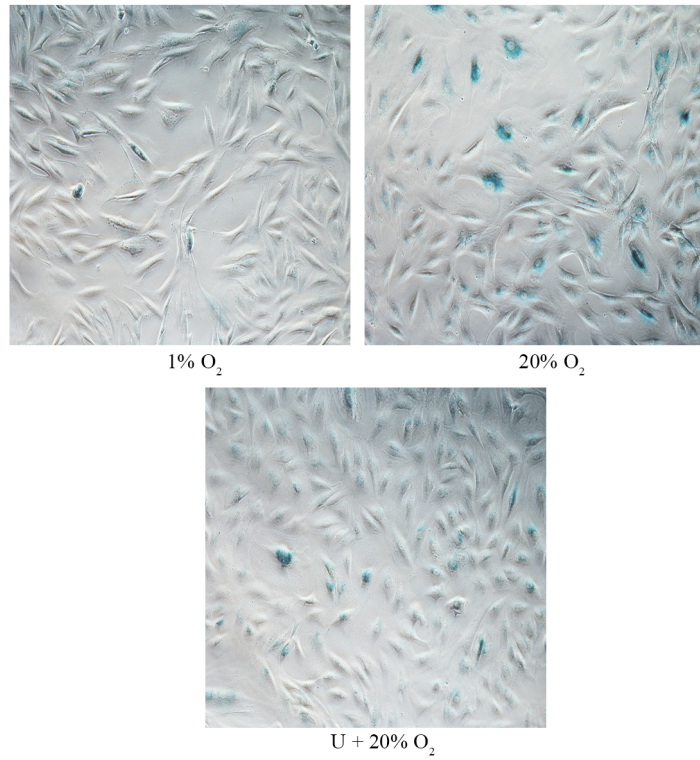

**Figure S2.** ERK inhibitor (U0126, U) suppressed the senescence-associated  $\beta$ -galactosidase (SA- $\beta$ -gal) staining of high oxygen tension-treated nucleus pulposus (NP) cells. NP cells were pretreated with U for 30 min followed by high oxygen tension treatment.

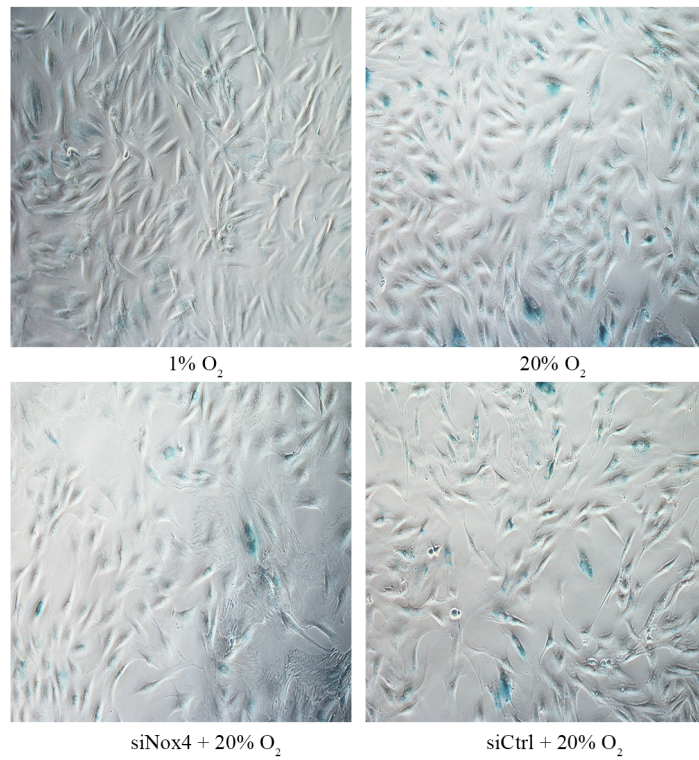

**Figure S3.** Small interfering RNA against Nox4 (siNox4) decreased the senescence-associated  $\beta$ -galactosidase (SA- $\beta$ -gal) staining of high oxygen tension-treated nucleus pulposus (NP) cells. NP cells were transfected with siNox4 or scrambled siRNA control (siCtrl) before high oxygen tension treatment.

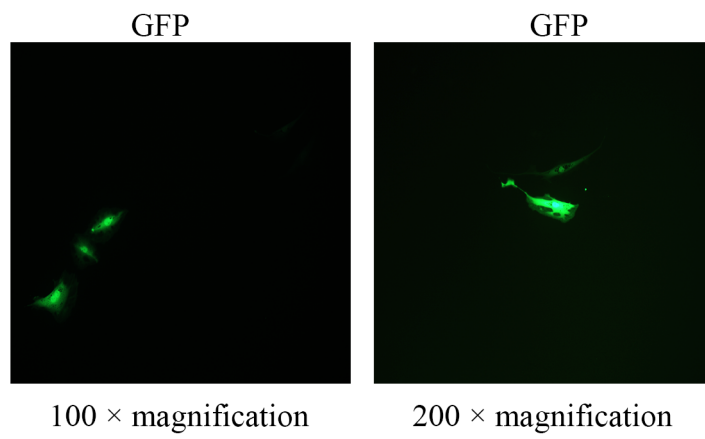

**Figure S4.** Nucleus pulposus (NP) cells transfected with Nox4 vectors synthesized green fluorescent proteins (GFP).

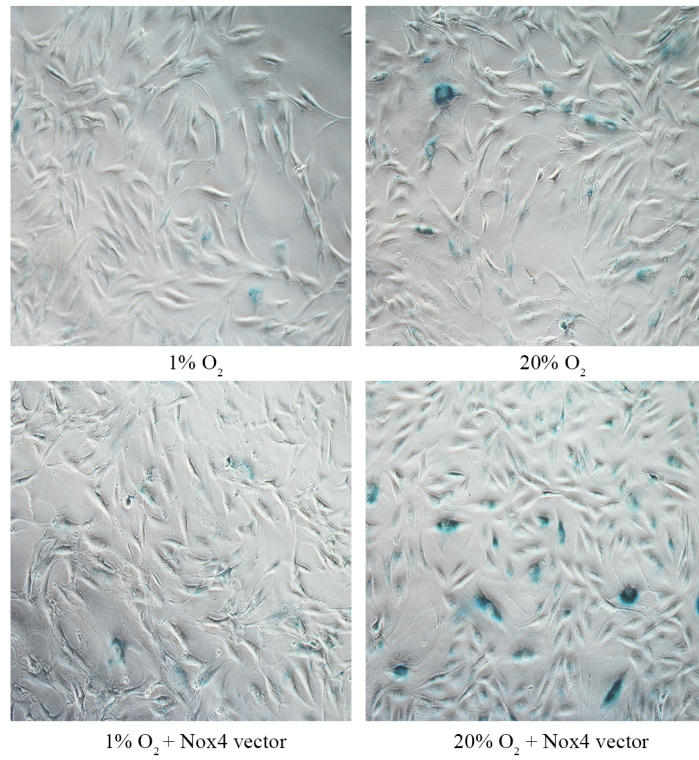

**Figure S5.** Nox4 overexpression reinforced the senescence-associated  $\beta$ -galactosidase (SA- $\beta$ -gal) staining of nucleus pulposus (NP) cells. NP cells were transfected with Nox4 vectors for Nox4 overexpression.

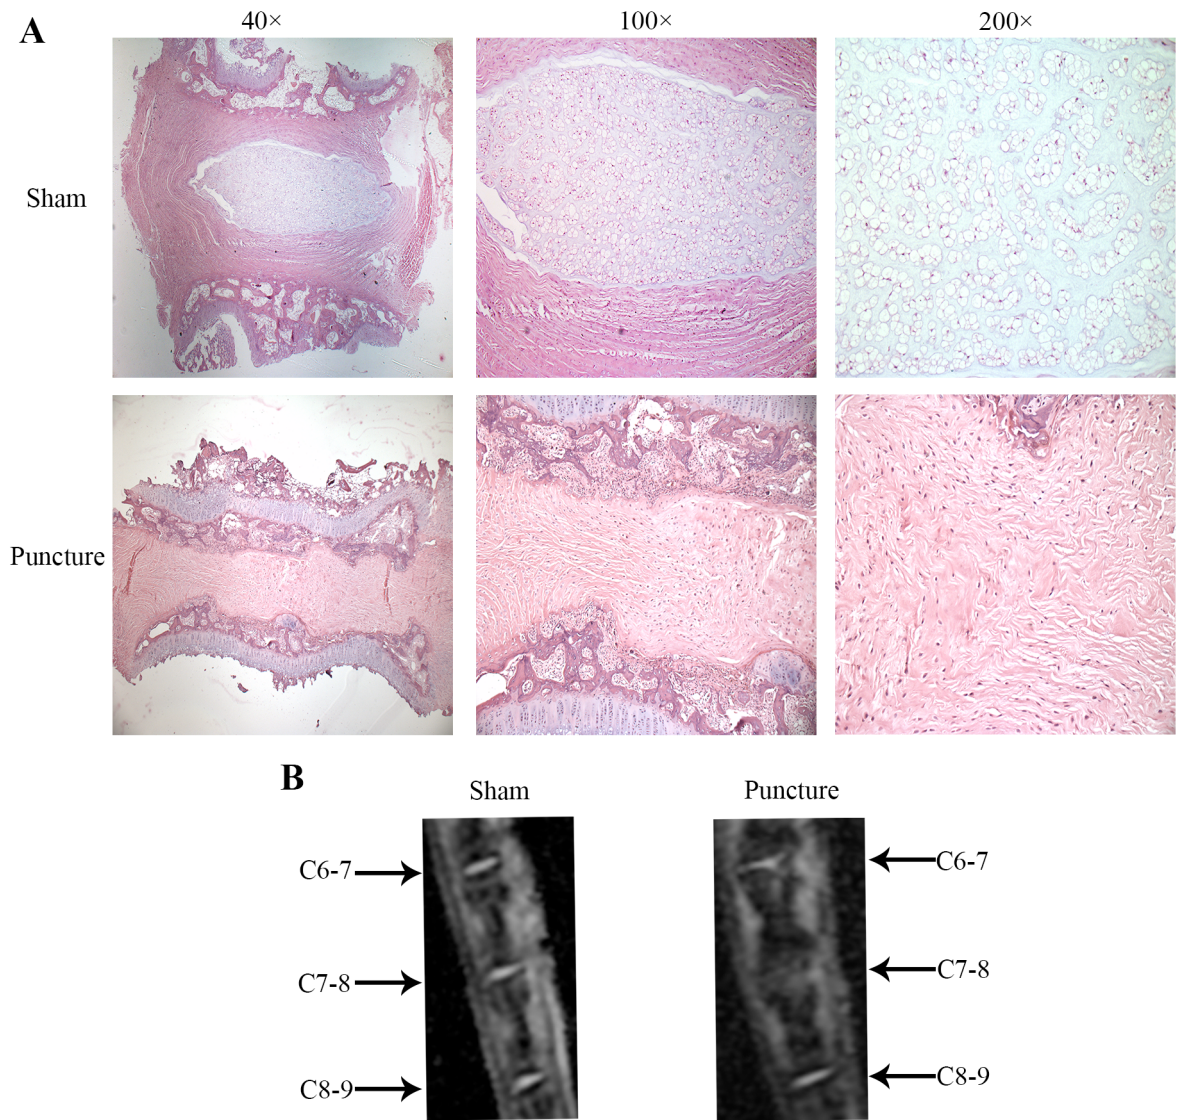

**Figure S6.** The rat caudal intervertebral disc degeneration caused by needle puncture.

(A) Hematoxylin and eosin (H&E)-stained sections of rat caudal discs, 1 month after needle puncture. (B) MRI characteristics of the punctured level (C7-8) and the internal control levels (C6-7, C8-9), 1 month after needle puncture. Sham: the sham control. Puncture: the puncture discs. 40×: 40 times magnification; 100×: 100 times magnification; 200×: 200 times magnification.

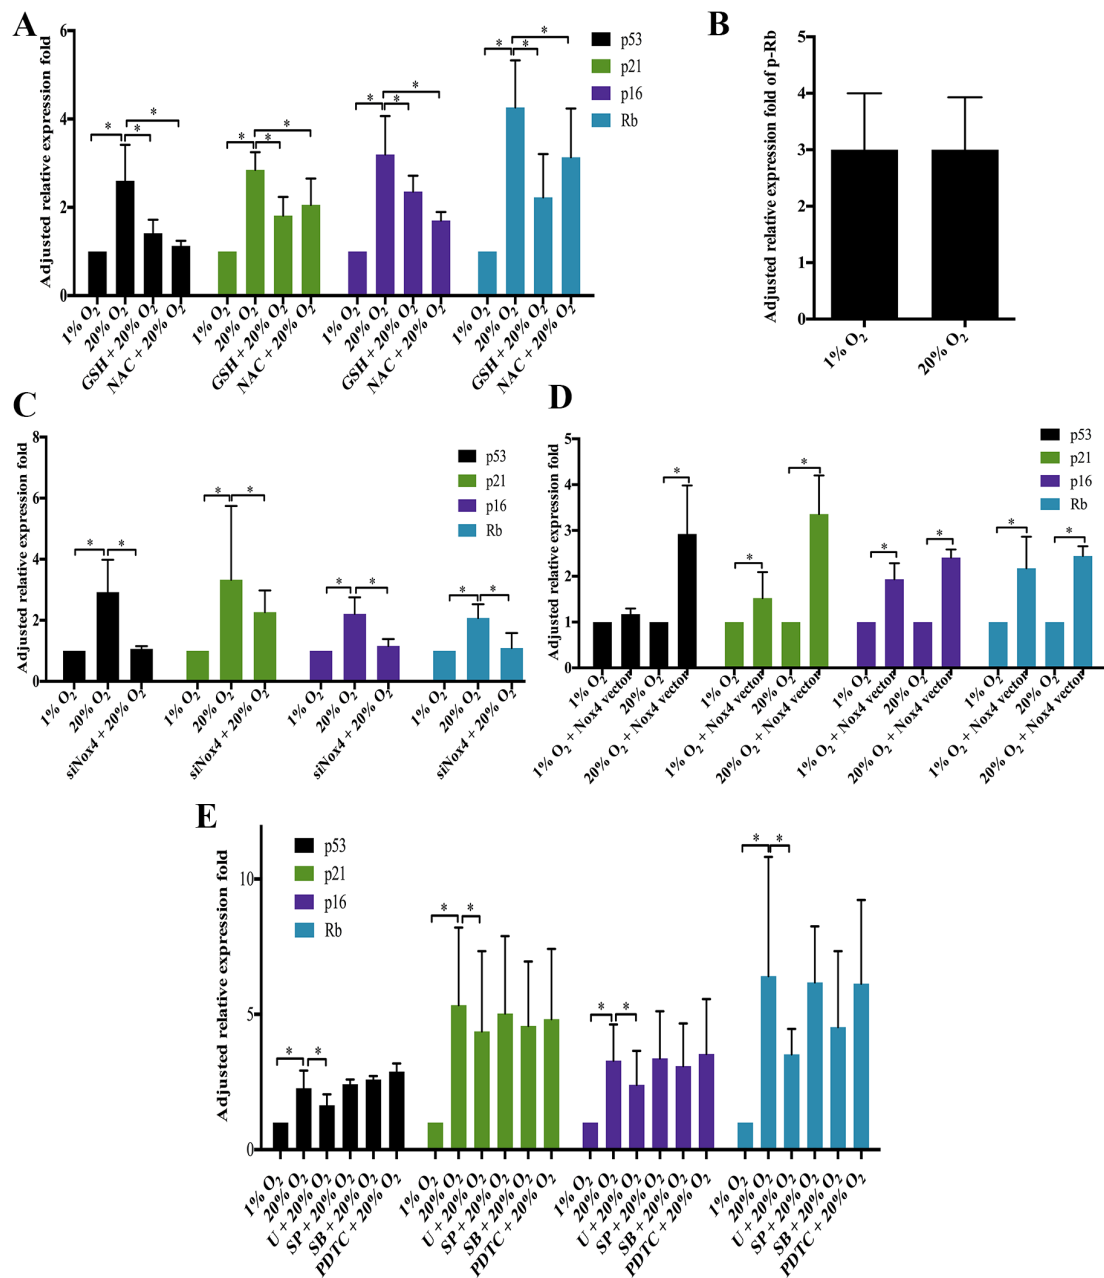

**Figure S7.** Adjusted relative expression fold of p53, p16, p21, Rb and p-Rb in NP cells. **(A)** NP cells were pretreated with GSH and NAC for 30 min followed by high oxygen tension treatment for ROS scavenging (N=5). **(B)** The adjusted relative expression fold of p-Rb was not affected by high oxygen tension (N=4). **(C)** NP cells were transfected with siNox4 before high oxygen tension treatment (N=3). **(D)** NP

cells were transfected with Nox4 vectors for Nox4 overexpression (N=3). **(E)** NP cells were pretreated with GSH, NAC, the p38 inhibitor (SB202190, SB), the JNK inhibitor (SP600125, SP), the ERK inhibitor (U0126, U) or the NF- $\kappa$ B inhibitor (PDTC) for 30 min followed by high oxygen tension treatment for ROS scavenging or signaling inhibition (N=3). \*, P value<0.05, error bars represent standard error.

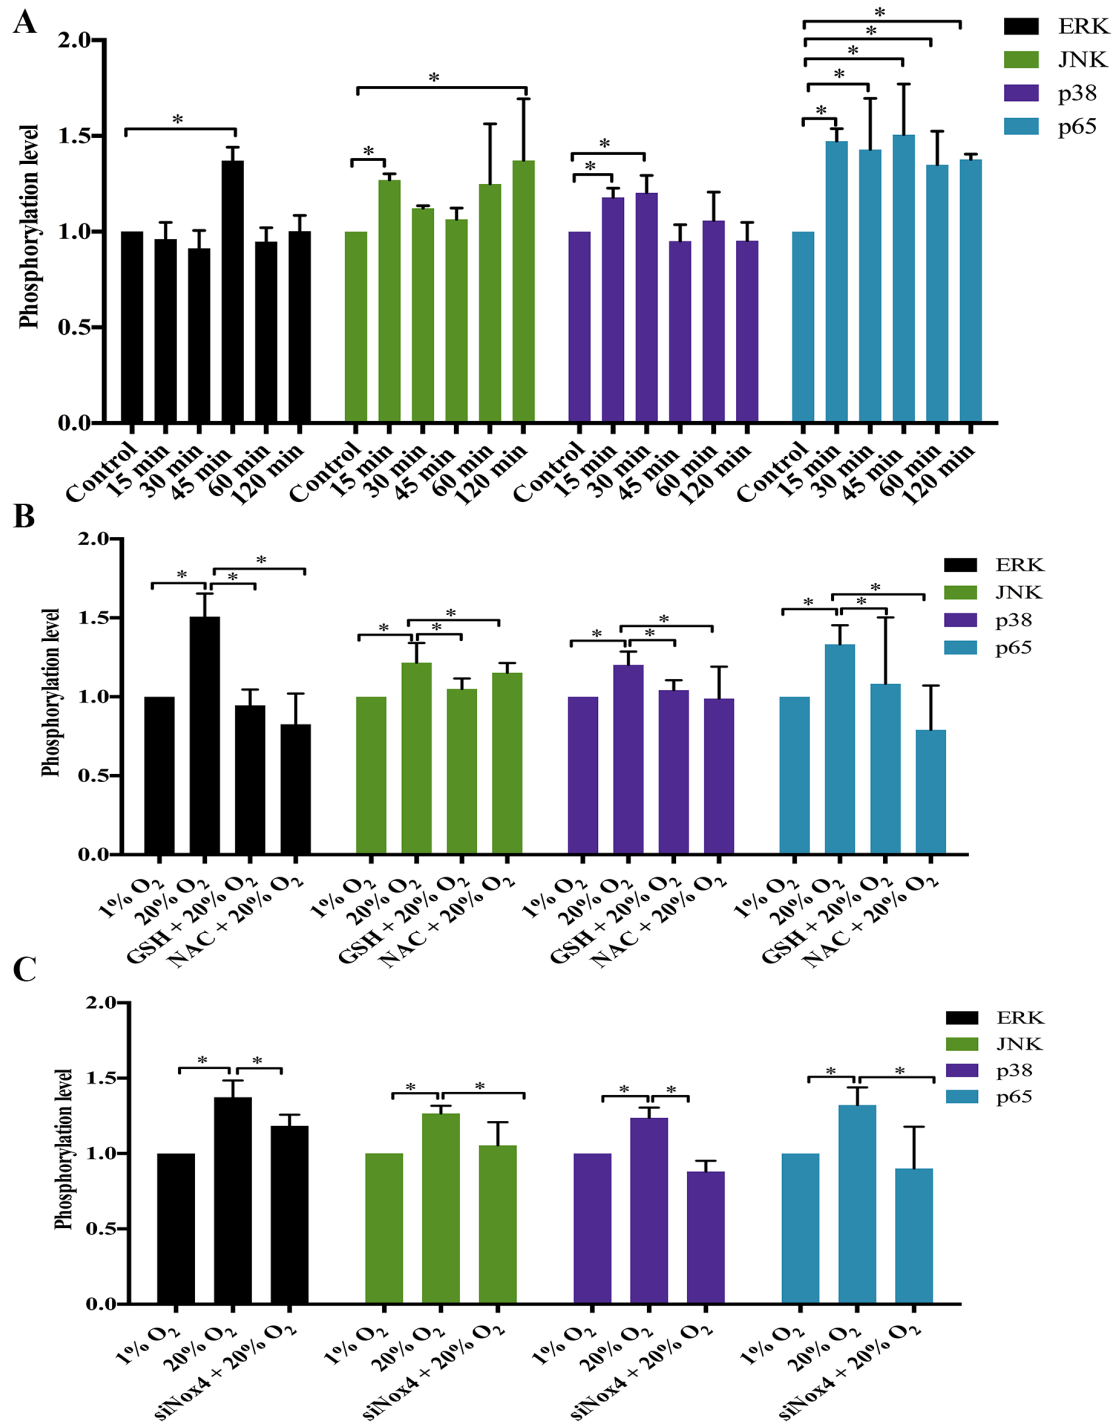

**Figure S8.** The phosphorylation level of ERK, JNK, p38, p65 in NP cells. (A) The phosphorylation of p38, ERK, JNK and p65 in NP cells treated with high oxygen tension for 15, 30, 45, 60 and 120 min. NP cells in 1% O<sub>2</sub> served as the control (N=3). (B) NP cells were pretreated with GSH and NAC followed by high oxygen tension treatment for ROS scavenging (N=3). (C) NP cells were transfected with siNox4

before high oxygen tension treatment (N=3). \*, P value<0.05, error bars represent standard error.

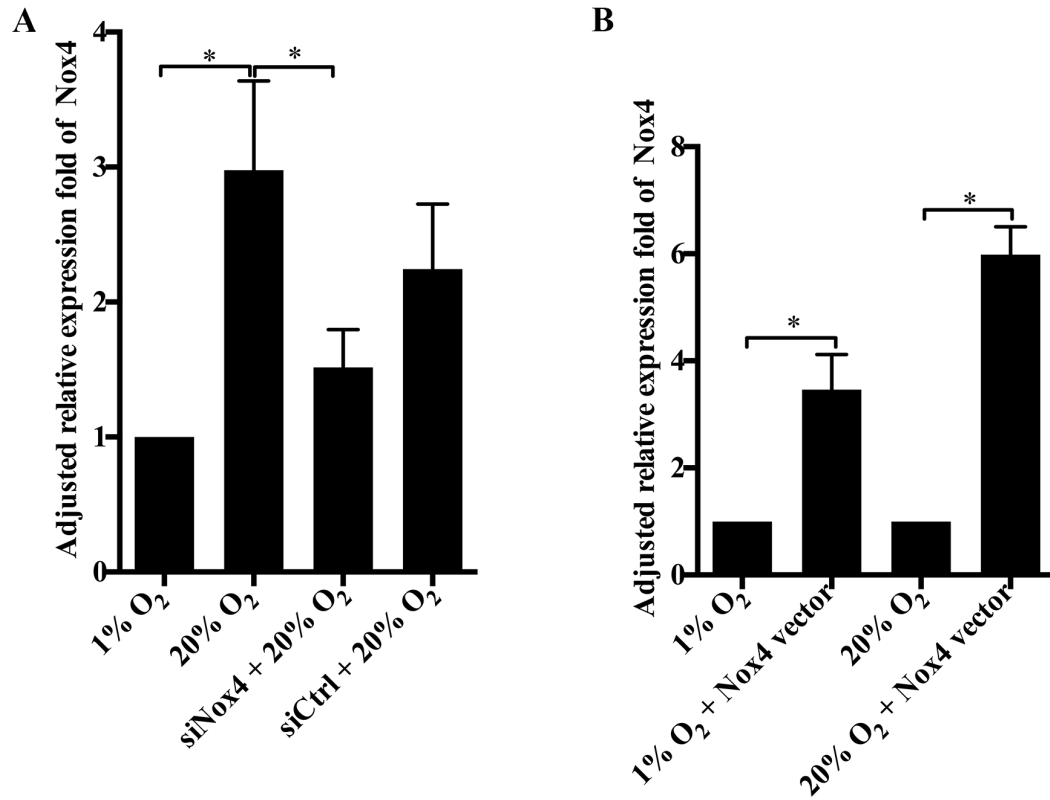

**Figure S9.** Adjusted relative expression fold of Nox4 in NP cells. **(A)** NP cells were transfected with siNox4 or scrambled siRNA control (siCtrl) before high oxygen tension treatment (N=4). **(B)** NP cells were transfected with Nox4 vectors for Nox4 overexpression (N=3). \*, P value<0.05, error bars represent standard error.
